# Supplementary material for: Regulation of Tomato Fruit Autophagic Flux and Promotion of Fruit Ripening by the Autophagy-Related Gene SlATG8f
Source: MDPI journal article supplement (doi:10.3390/plants12183339), 2023-09-21
Supplement: s1 [file s1]

**Table S2.** *SLATG8f clone-specific primers*

| Primer   | Sequence (5'-3')                    |
|----------|-------------------------------------|
| Primer-F | cagtGGTCTCacaacatggctaagagctcattcaa |
| Primer-R | cagtGGTCTCatacacagttcgctcaggaccccga |
