# Supplementary material for: Regulation of Tomato Fruit Autophagic Flux and Promotion of Fruit Ripening by the Autophagy-Related Gene SlATG8f
Source: MDPI journal article supplement (doi:10.3390/plants12183339), 2023-09-21
Supplement: s1 [file s1]

**Table S1.** *ATG8* family members, ethylene-related genes, SIPSY1, SICRTISO primer design table.

| Gene ID        | Gene             | Primer sequence(5'→3')      |
|----------------|------------------|-----------------------------|
| Solyc01g068060 | <i>SlATG8a-F</i> | CGTGAAGCAAAGAAATGGGGAAGAC   |
|                | <i>SlATG8a-R</i> | ACCGGCACACGATCAGGATATTTG    |
| Solyc02g080590 | <i>SlATG8b-F</i> | TTATGTGGTGCGGAAGAGGATCAAG   |
|                | <i>SlATG8b-R</i> | AGAGAAGCTGTTGGAGGCAAAGTG    |
| Solyc03g031650 | <i>SlATG8c-F</i> | TCCGAAAGAGGATCAATCTCAGTGC   |
|                | <i>SlATG8c-R</i> | CAGACATCAGAGCAGCAGTTGGAG    |
| Solyc07g064680 | <i>SlATG8d-F</i> | GCTGCCATGATGTCTGCCATTTATG   |
|                | <i>SlATG8d-R</i> | GAAGGTATTCTCGCCACTGTAGGTC   |
| Solyc08g007400 | <i>SlATG8e-F</i> | TTGACGGTAGGGCAGTTTGTGTATG   |
|                | <i>SlATG8e-R</i> | TGGAAGACATGATTGCACCTGTTGG   |
| Solyc08g078820 | <i>SlATG8f-F</i> | ACAATGTGCTACCGCCAACAGG      |
|                | <i>SlATG8f-R</i> | GGTAACATAGAGGAAGCCGTCATCG   |
| Solyc10g006270 | <i>SlATG8g-F</i> | TTGGTTCCTGCTGATCTAACTGTGG   |
|                | <i>SlATG8g-R</i> | TGCTCCTCATAAATGGCGGACATC    |
| AY192368.1     | <i>ERF2-F</i>    | CGTTTGTTCATCCACCGACCT       |
|                | <i>ERF2-R</i>    | GTCACGAATTTACAGCAGCCC       |
| U38666.1       | <i>NR-F</i>      | ATCGCATTCTCCGTCGTCAT        |
|                | <i>NR-R</i>      | TCCATTATCTCGTTTCGTCCC       |
| NM_001247220.2 | <i>ETR1-F</i>    | ATGGATGAGAATGGTGTTAGCAGGA   |
|                | <i>ETR1-R</i>    | CACAATAAGTGGCCTACCGTGACGT   |
| AF118843.1     | <i>ETR4-F</i>    | GTTCTTGGGCTTCAACTGCG        |
|                | <i>ETR4-R</i>    | ACAGCAGGGCTAAGAACACC        |
| NM_001247276.2 | <i>ETR3-F</i>    | AAGGGAACCACTGTCACGTTTGTAG   |
|                | <i>ETR3-R</i>    | TTAATGTTCTTTGTCACACCAATGTCC |
| Solyc05g050010 | <i>ACC4-F</i>    | CAAGCACAATGGAAGAGGAACAACC   |
|                | <i>ACC4-R</i>    | CGCACTACGAGCAAGGAATTGGAG    |
| Solyc07g049530 | <i>ACO1-F</i>    | CCACCATGTCCTAAGCCCGATTG     |
|                | <i>ACO1-R</i>    | TTGCTCGTCTTTGAGGAGTTGAAGG   |
| Solyc01g095080 | <i>ACC2-F</i>    | GCTTAACGTCTCGCCTGGATCTTC    |

---

|                |                 |                           |
|----------------|-----------------|---------------------------|
| Solyc03g031860 | <i>ACC2-R</i>   | CTCAACACCTACGAACCTCCGAATC |
|                | <i>PSY1-F</i>   | TTGCTGGAAGGGTGACCGATAAATG |
|                | <i>PSY1-R</i>   | ACAAGACCAAAGATGCCCATACAGG |
| AF416727       | <i>CRTISO-F</i> | TTTTGGCGGAATCAACTACC      |
|                | <i>CRTISO-R</i> | GAAAGCTTCACTCCCACAGC      |
| Solyc03g078400 | <i>Actin-F</i>  | TGGTCGGAATGGGACAGAAG      |
|                | <i>Actin-R</i>  | CTCAGTCAGGAGAACAGGGT      |

---
